# Supplementary material
Source: PubMed Central journal article supplement (PMC5421576)

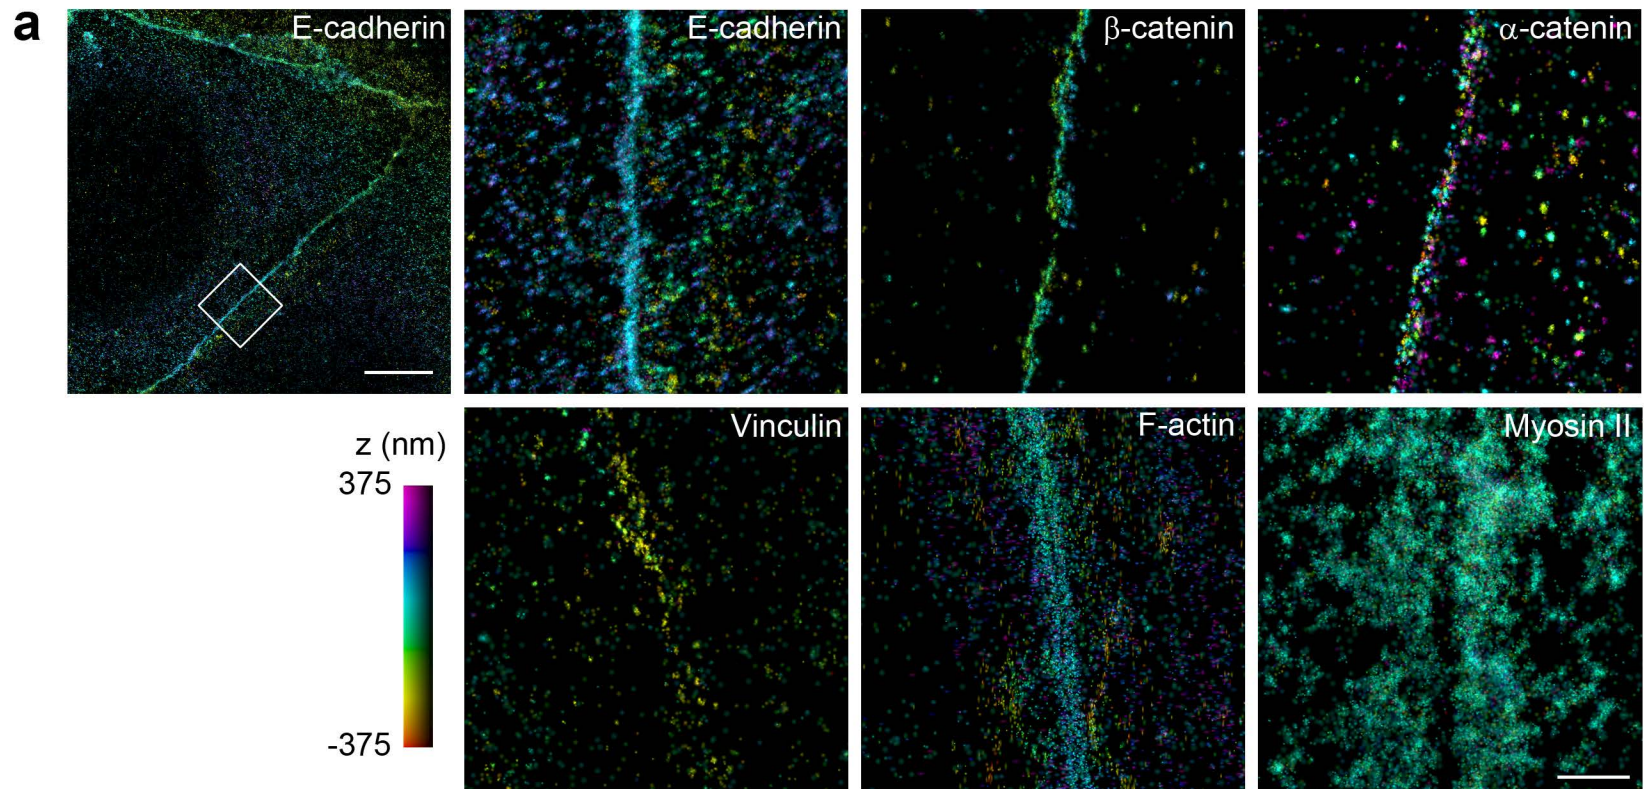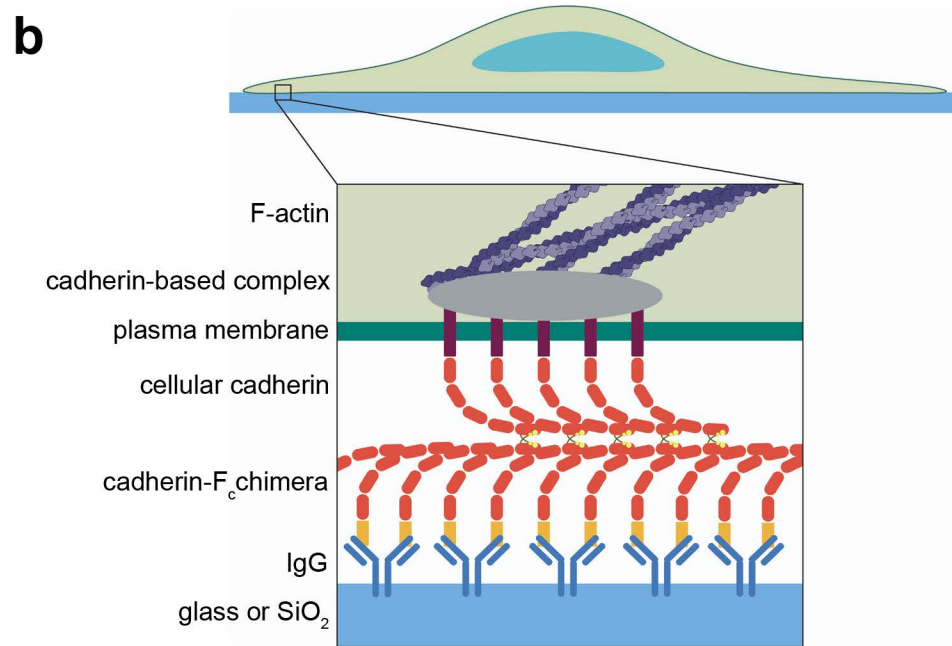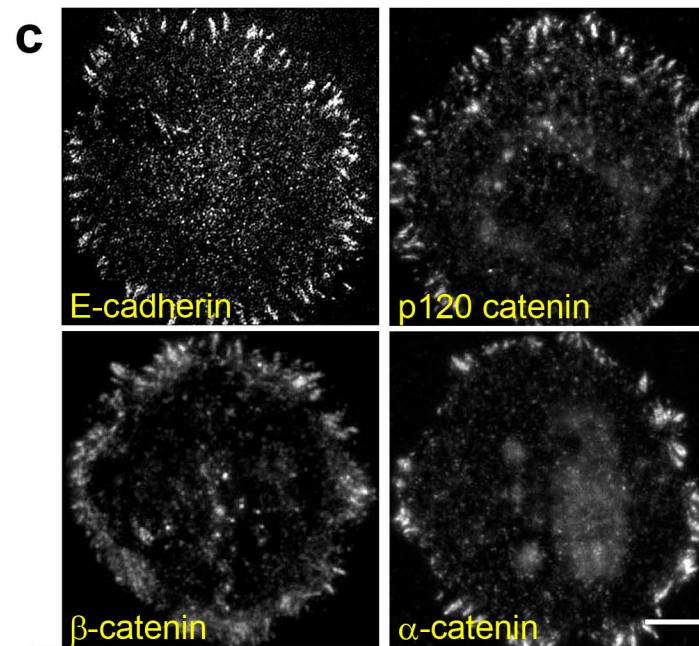

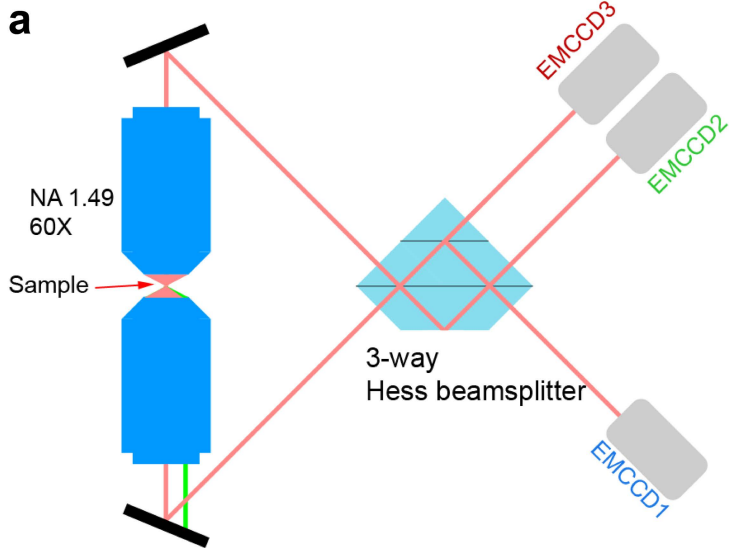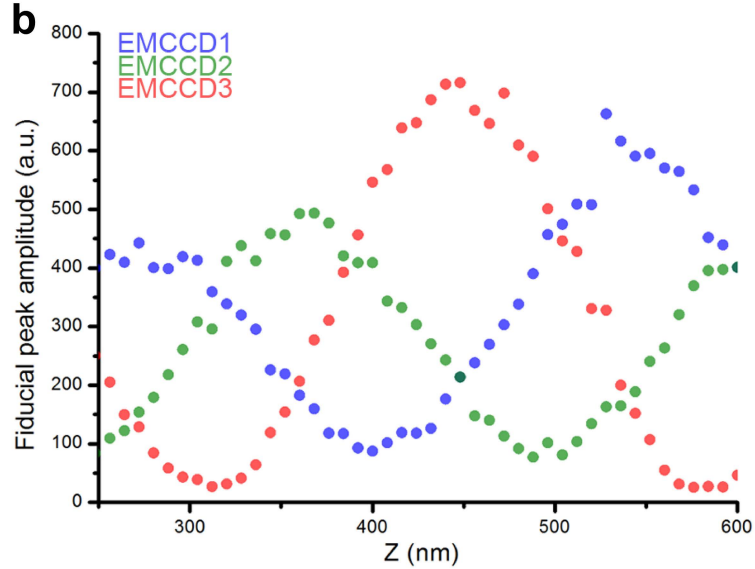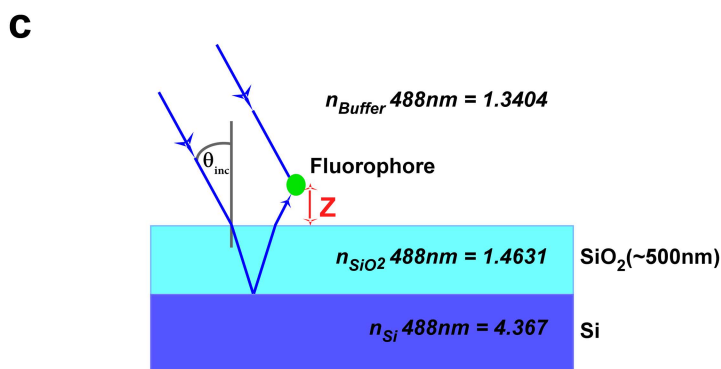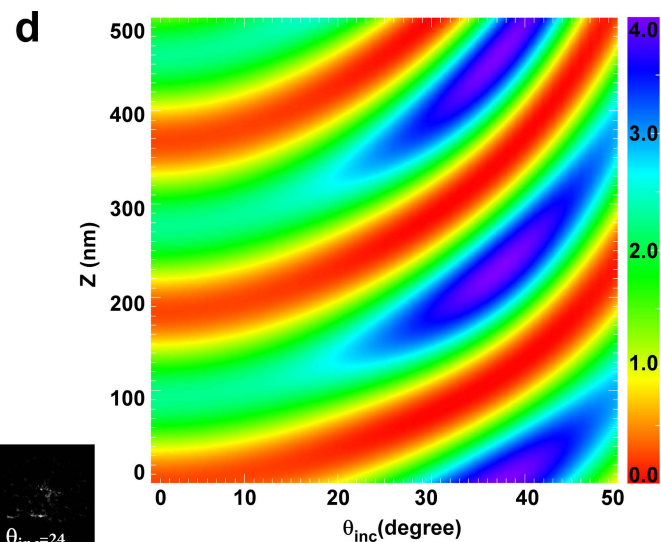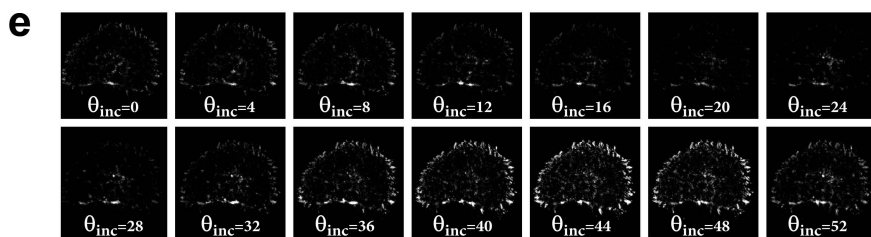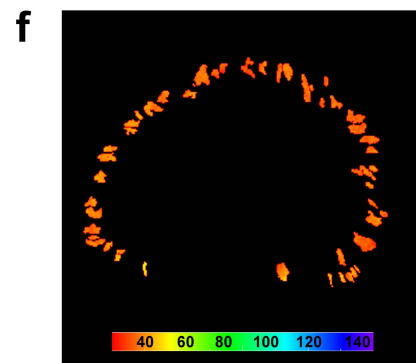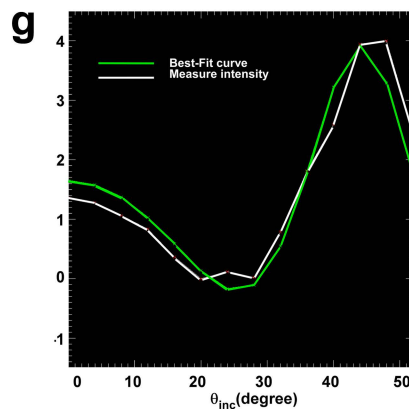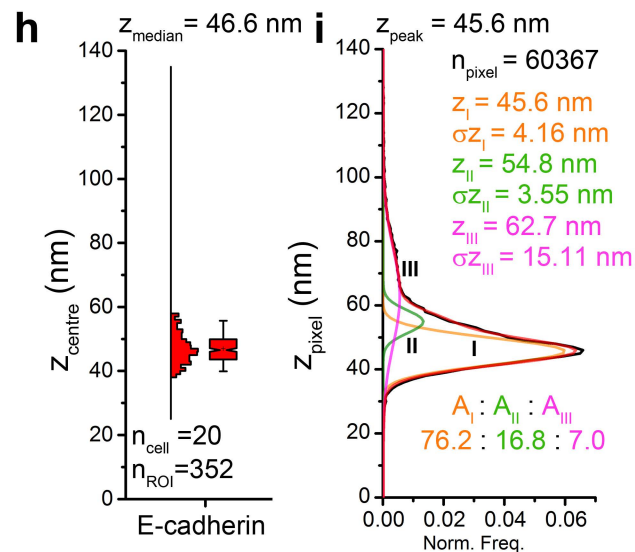

**a**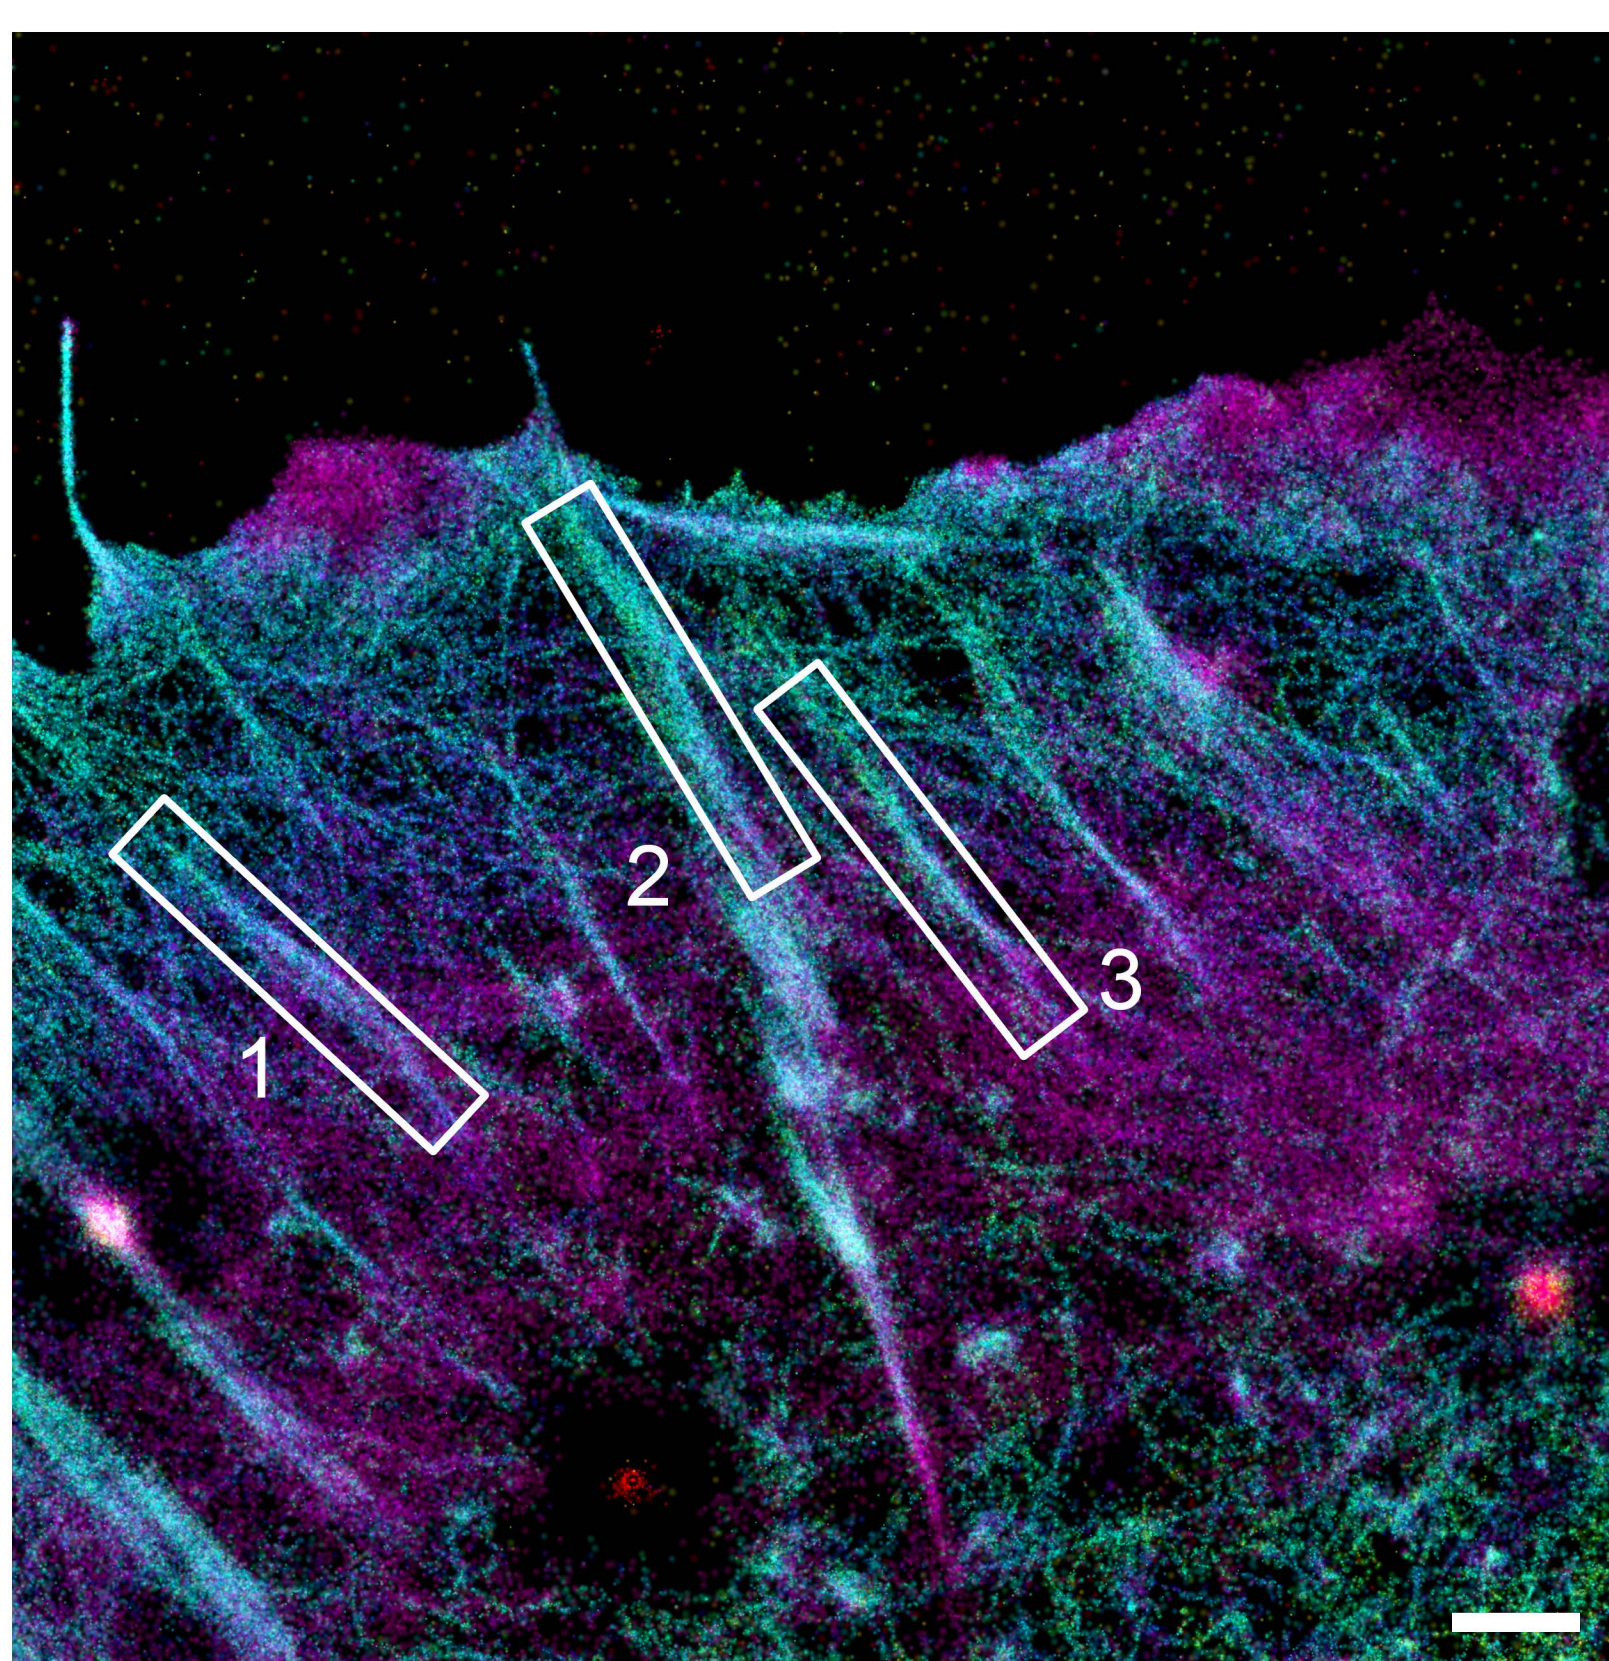**b**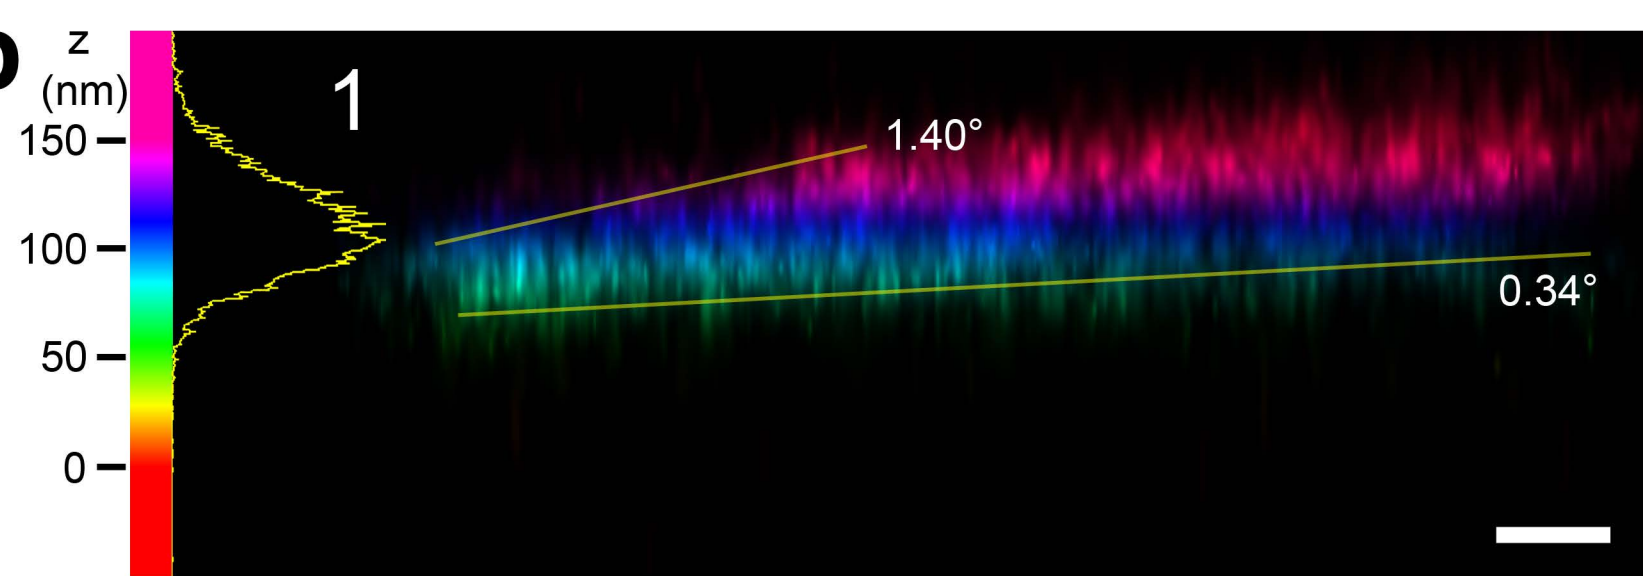**c**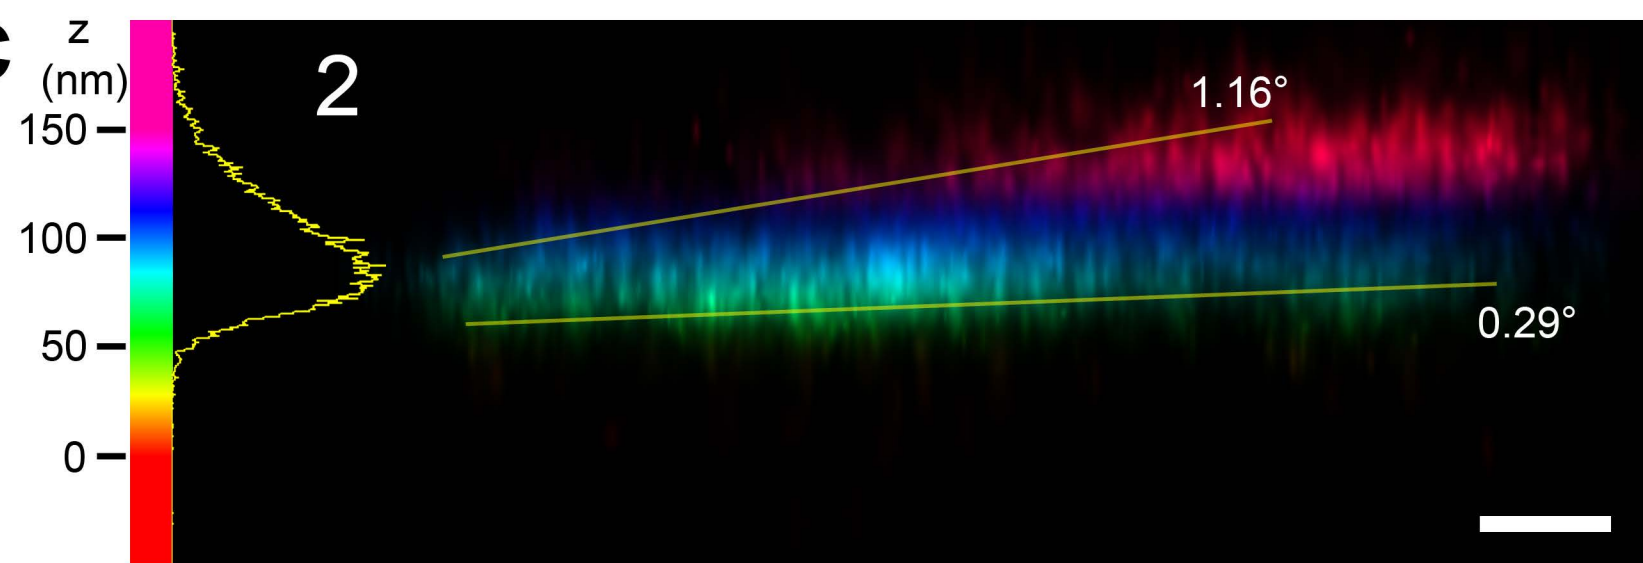**d**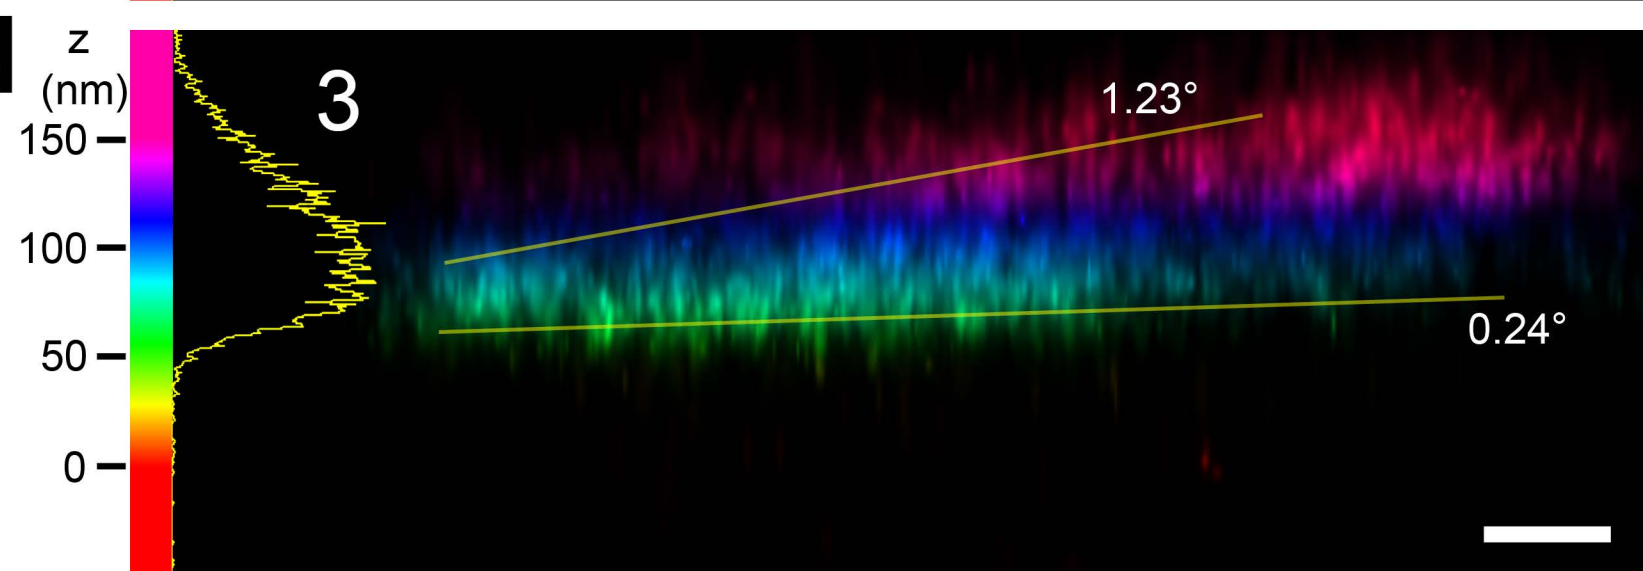**e**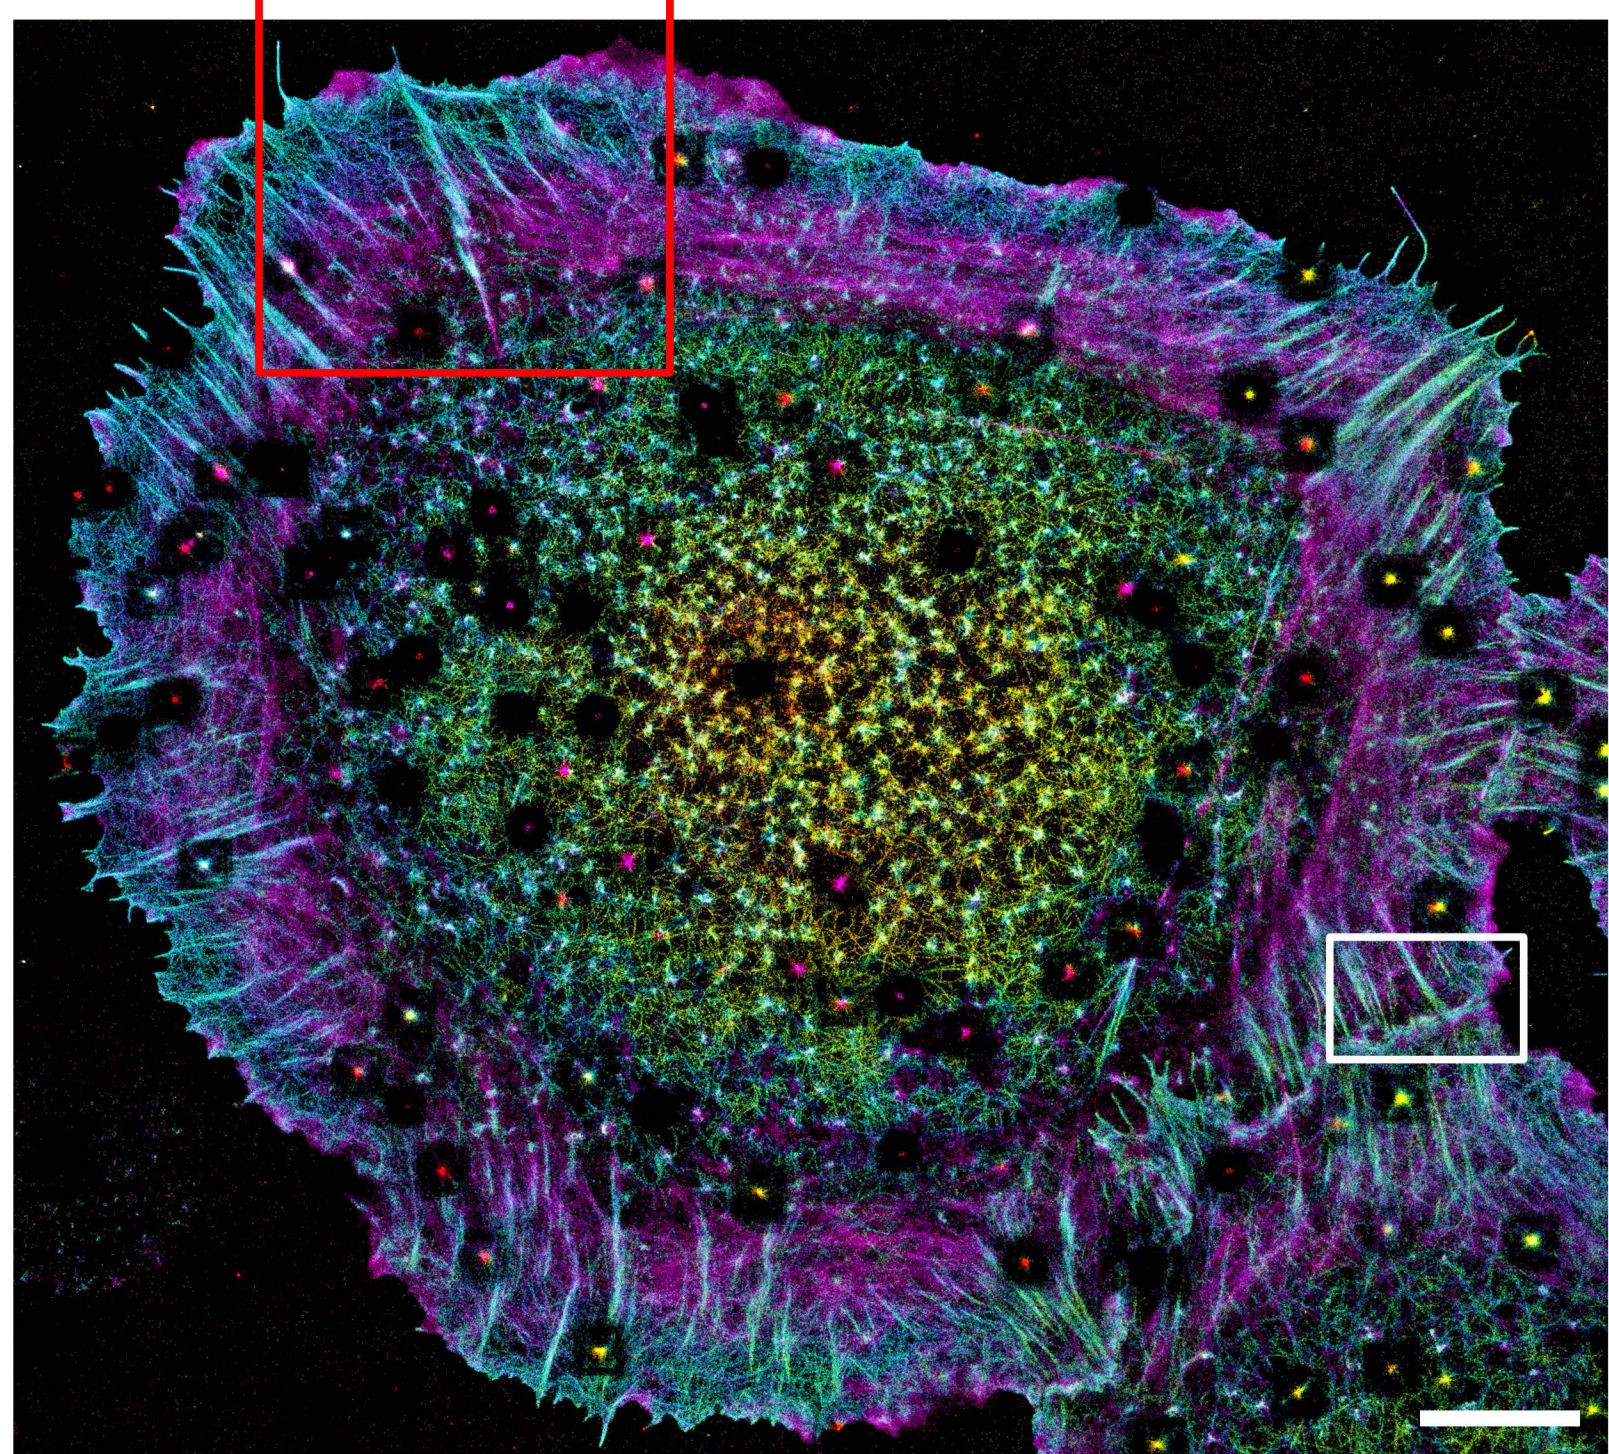**f**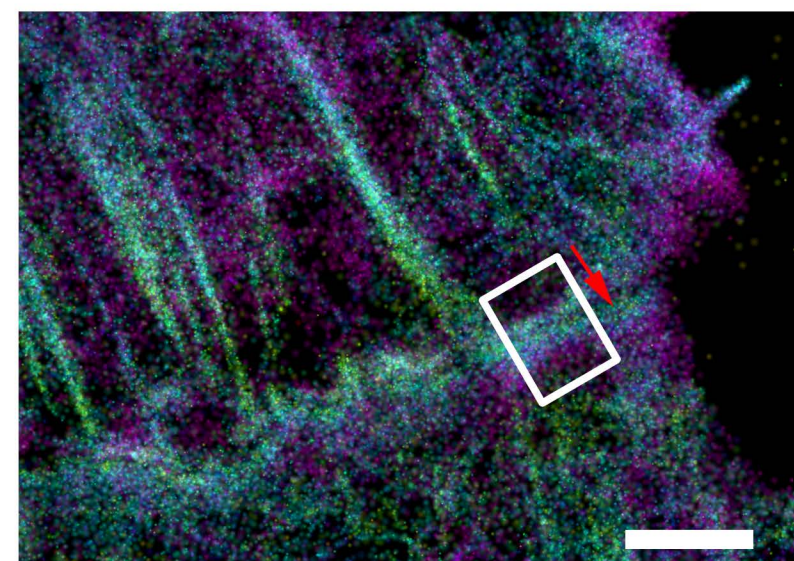**g**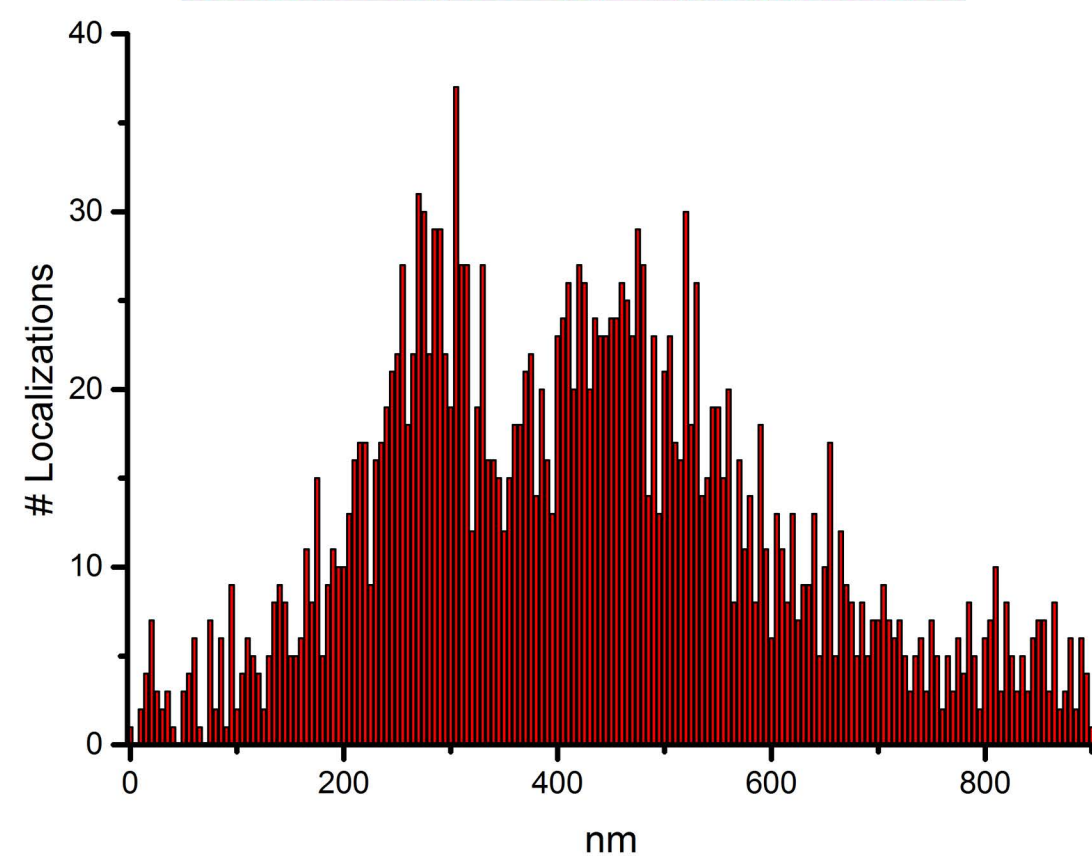

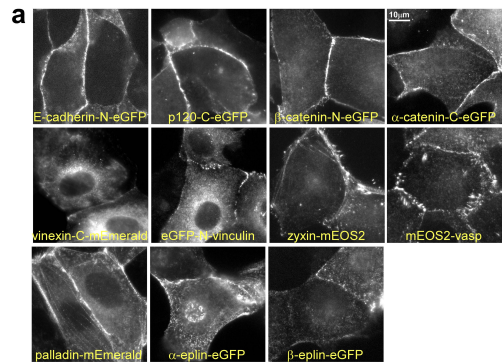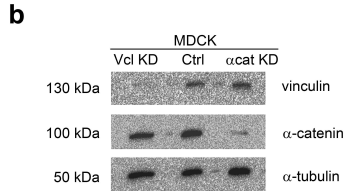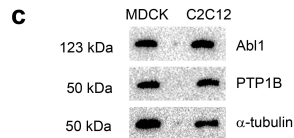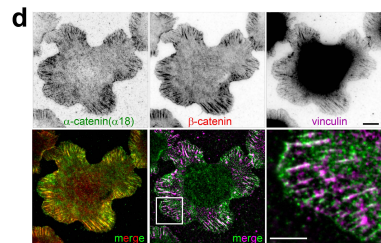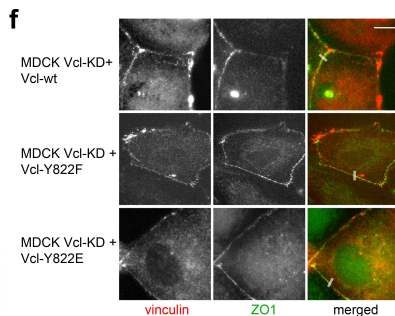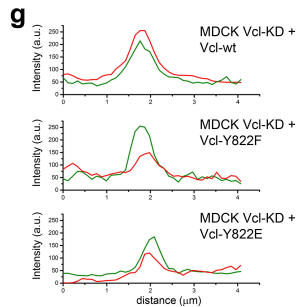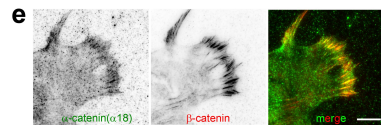

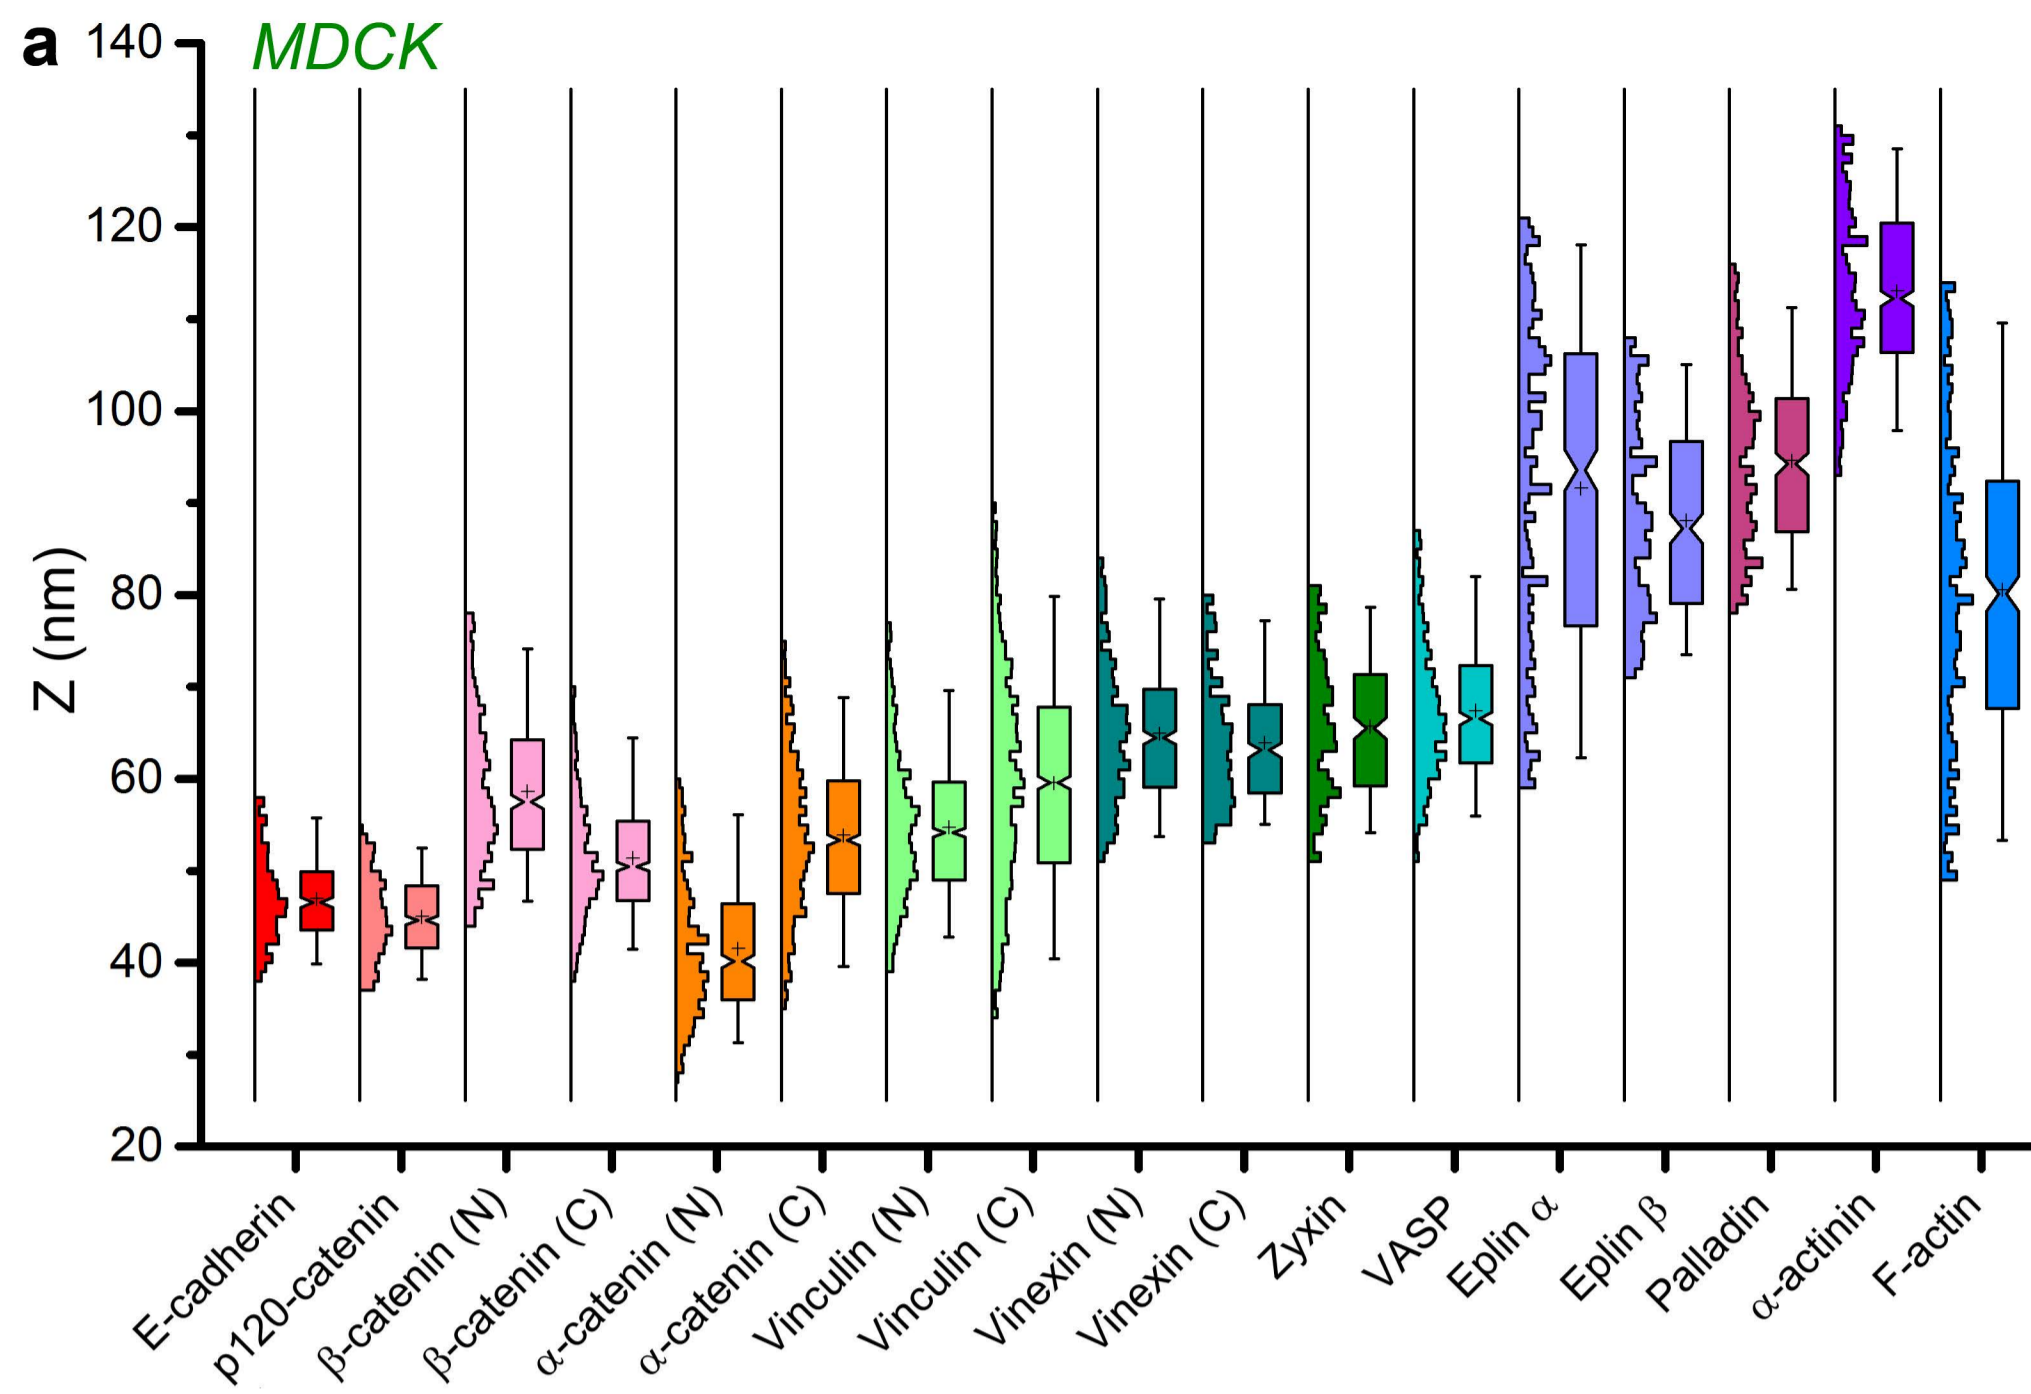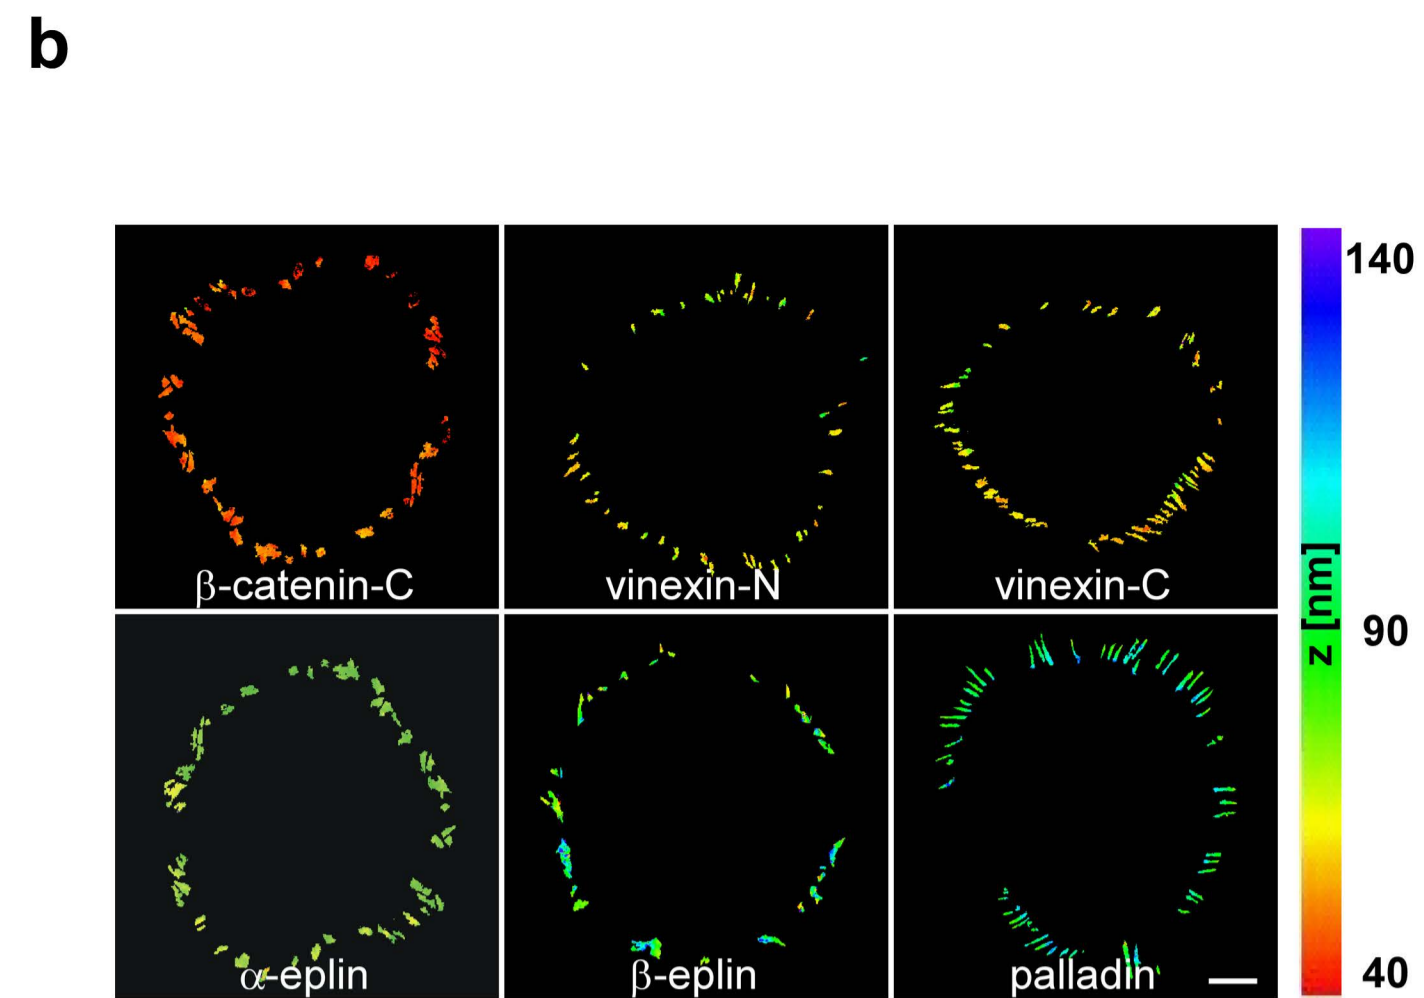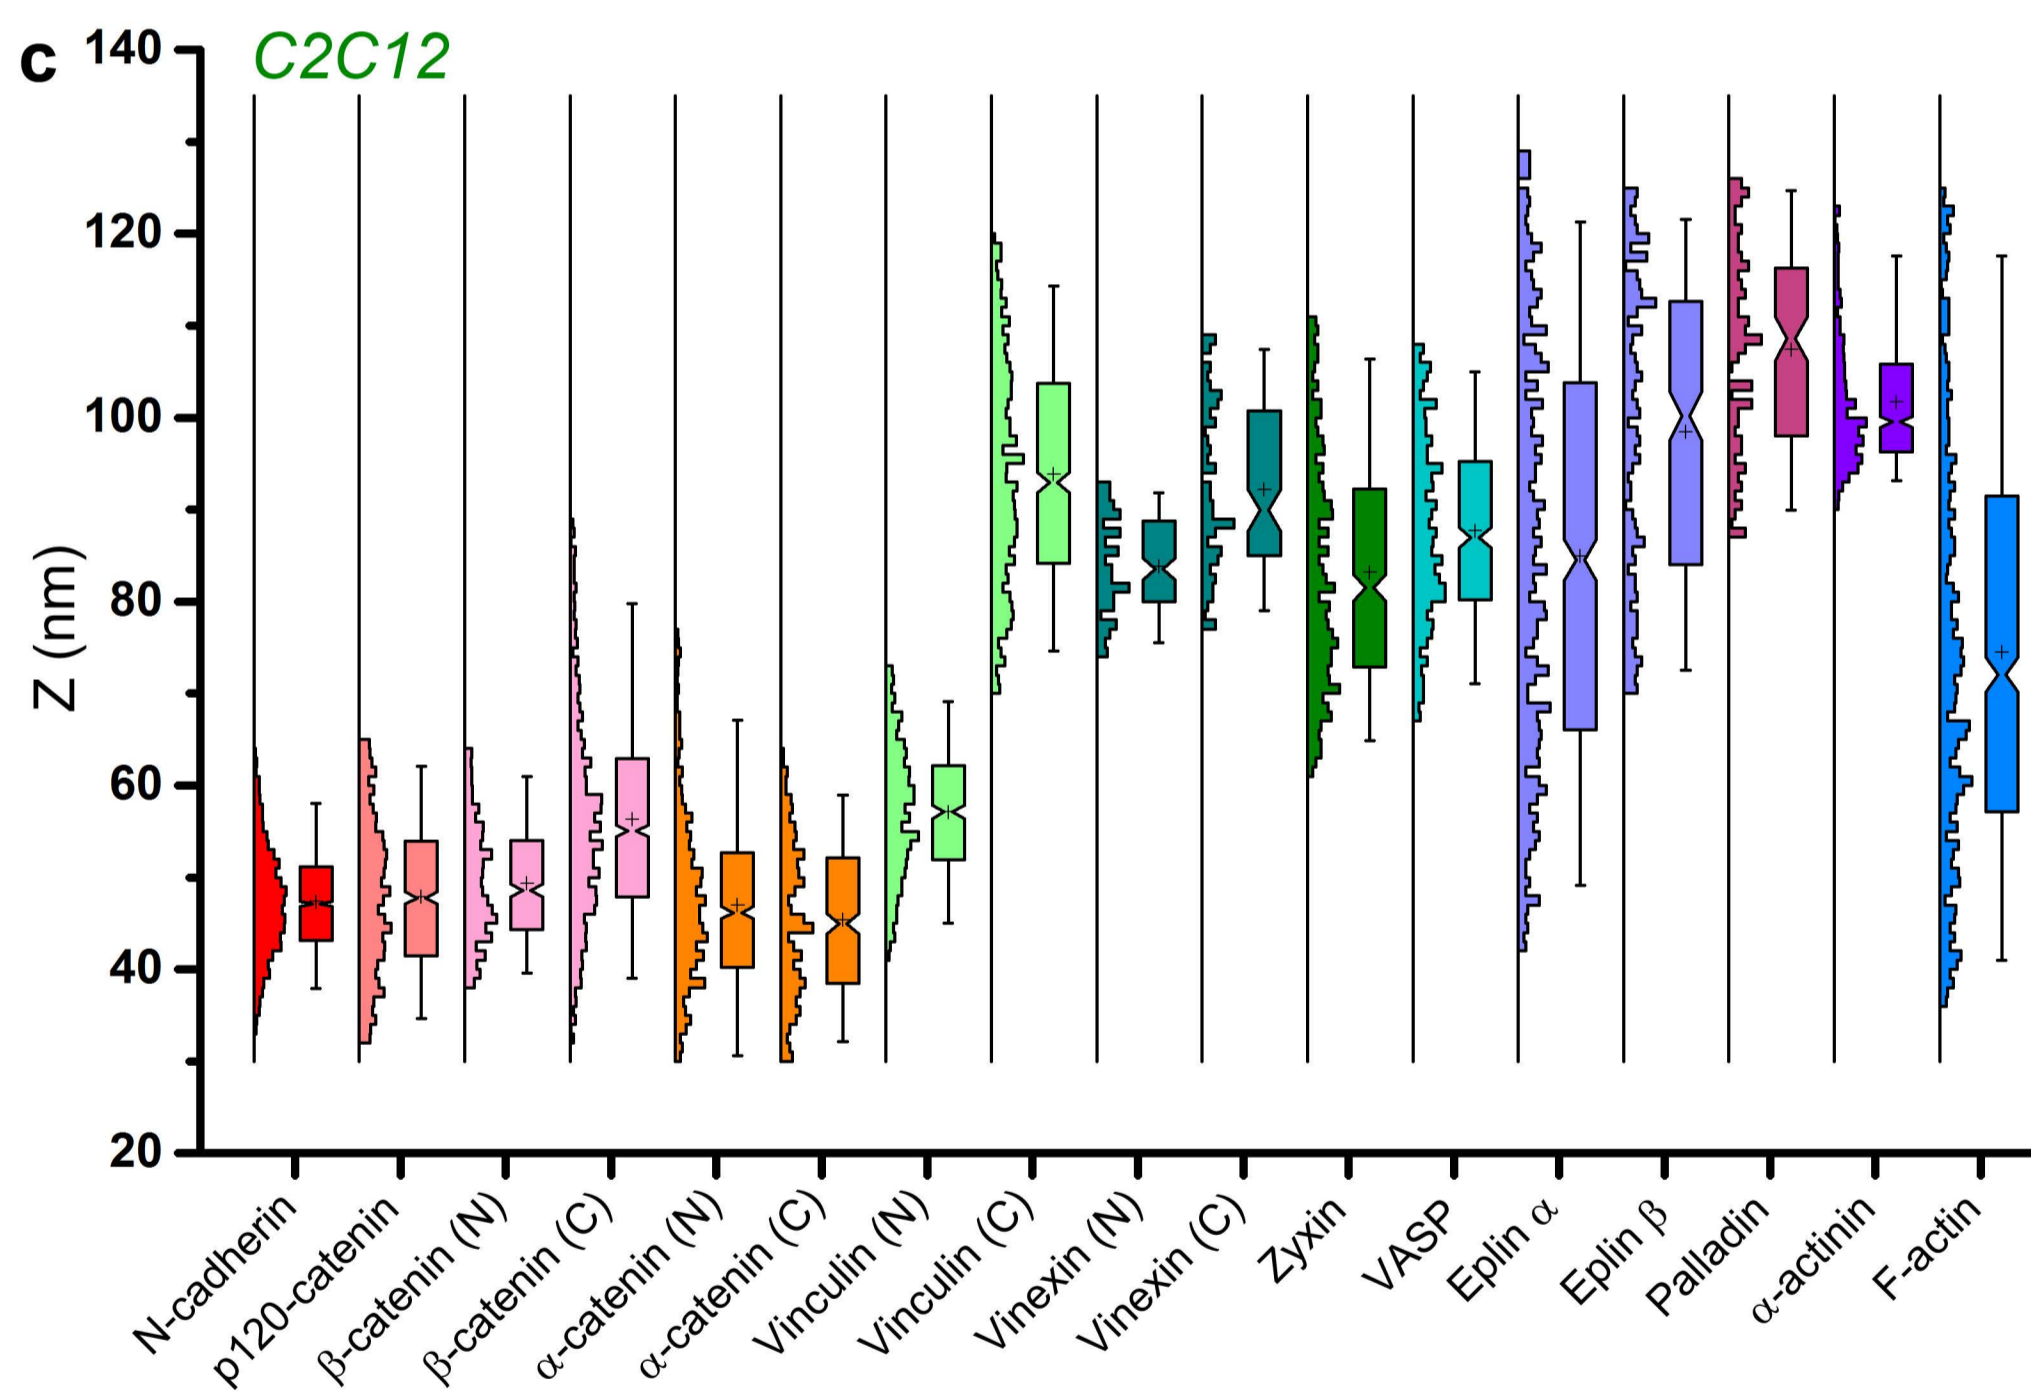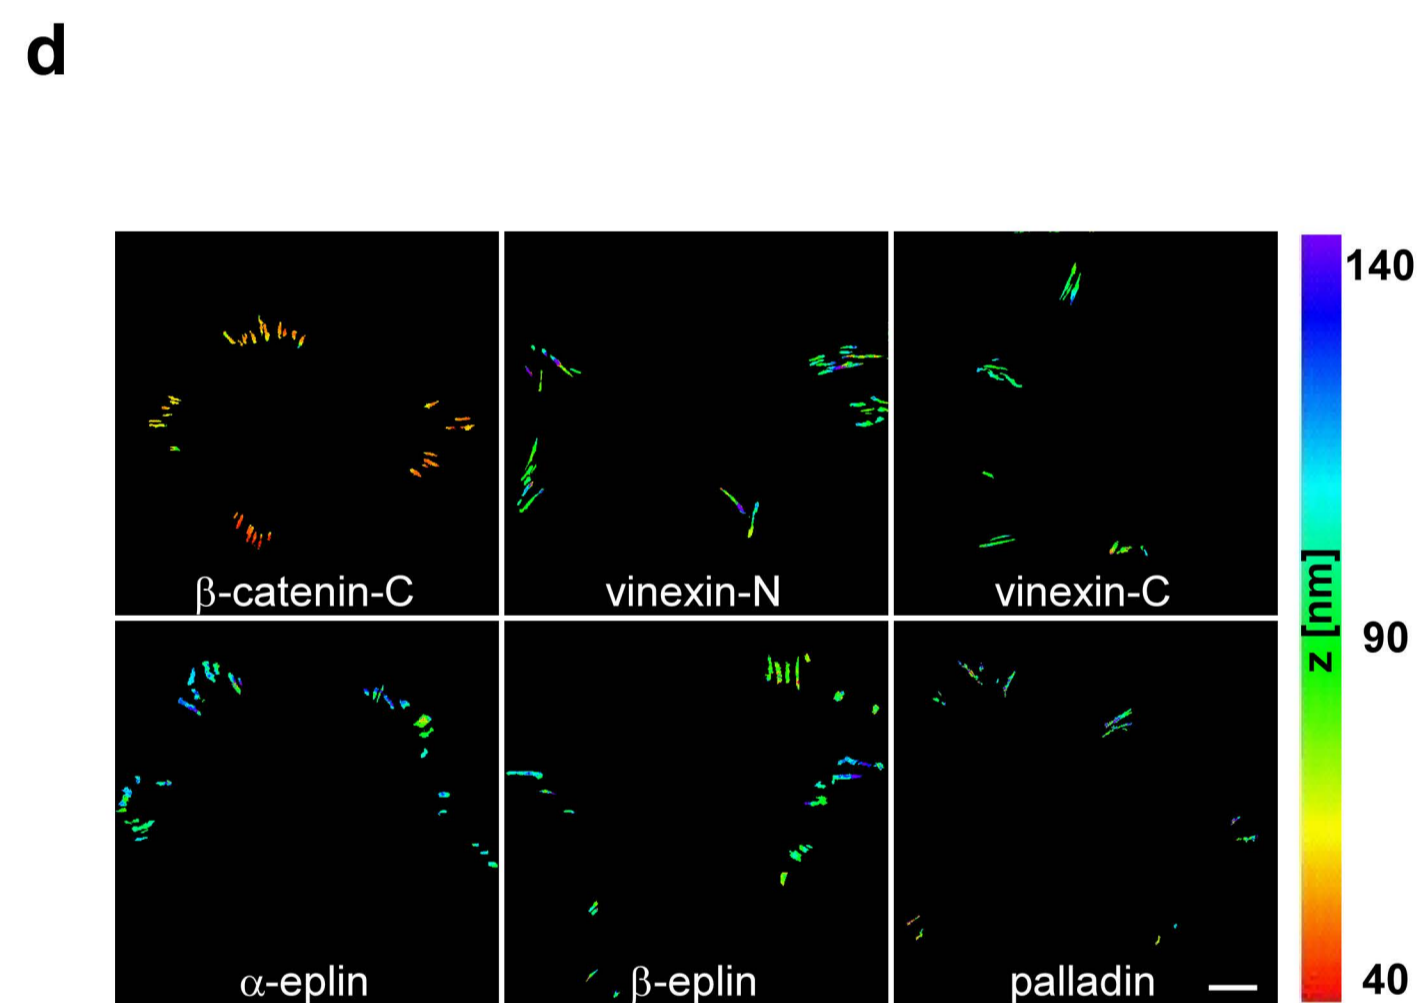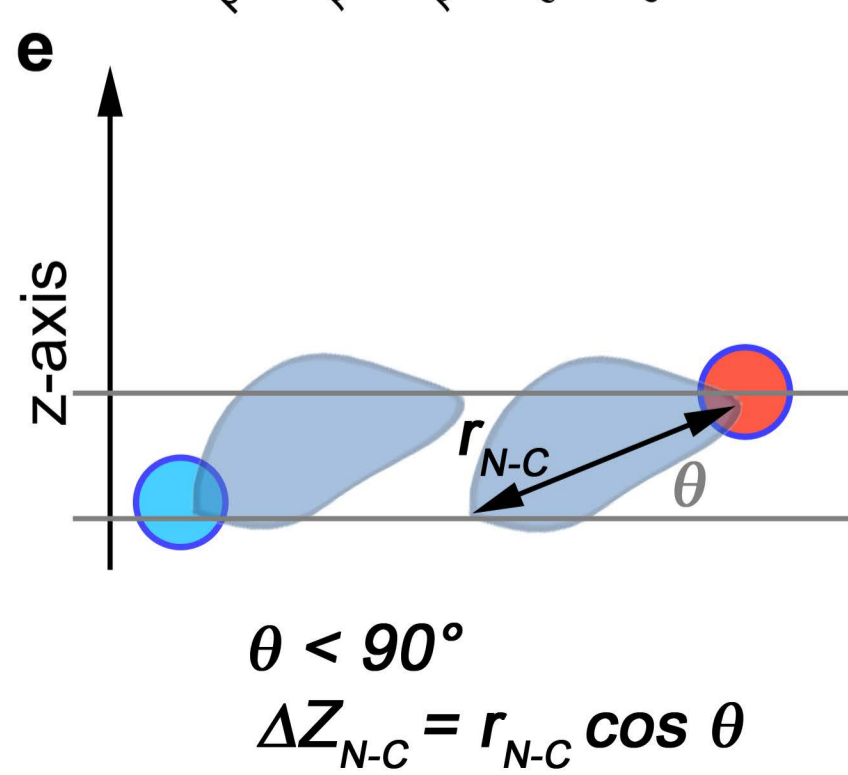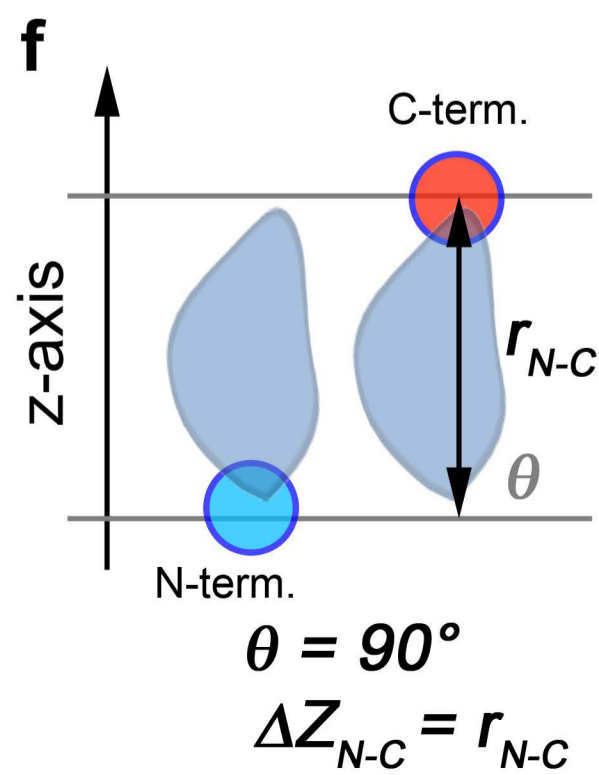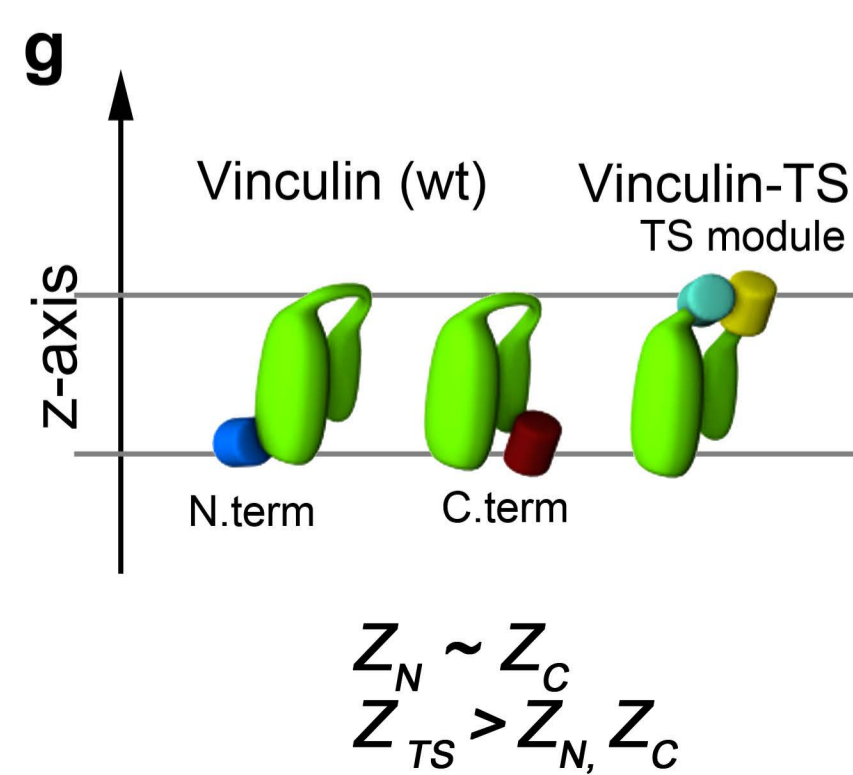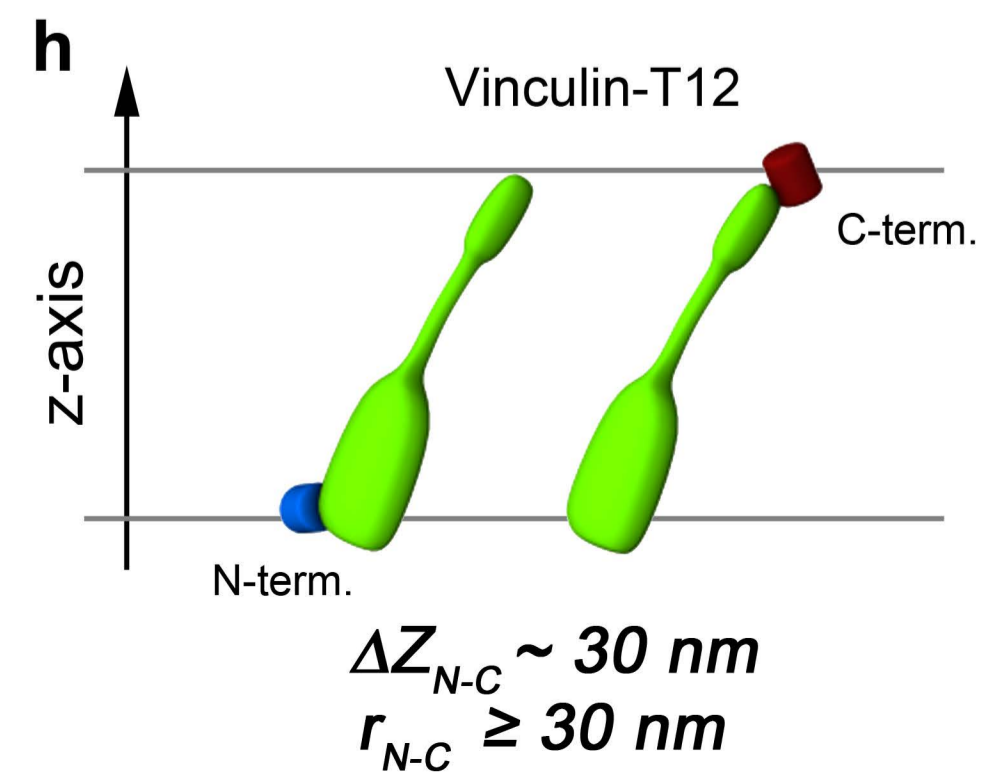

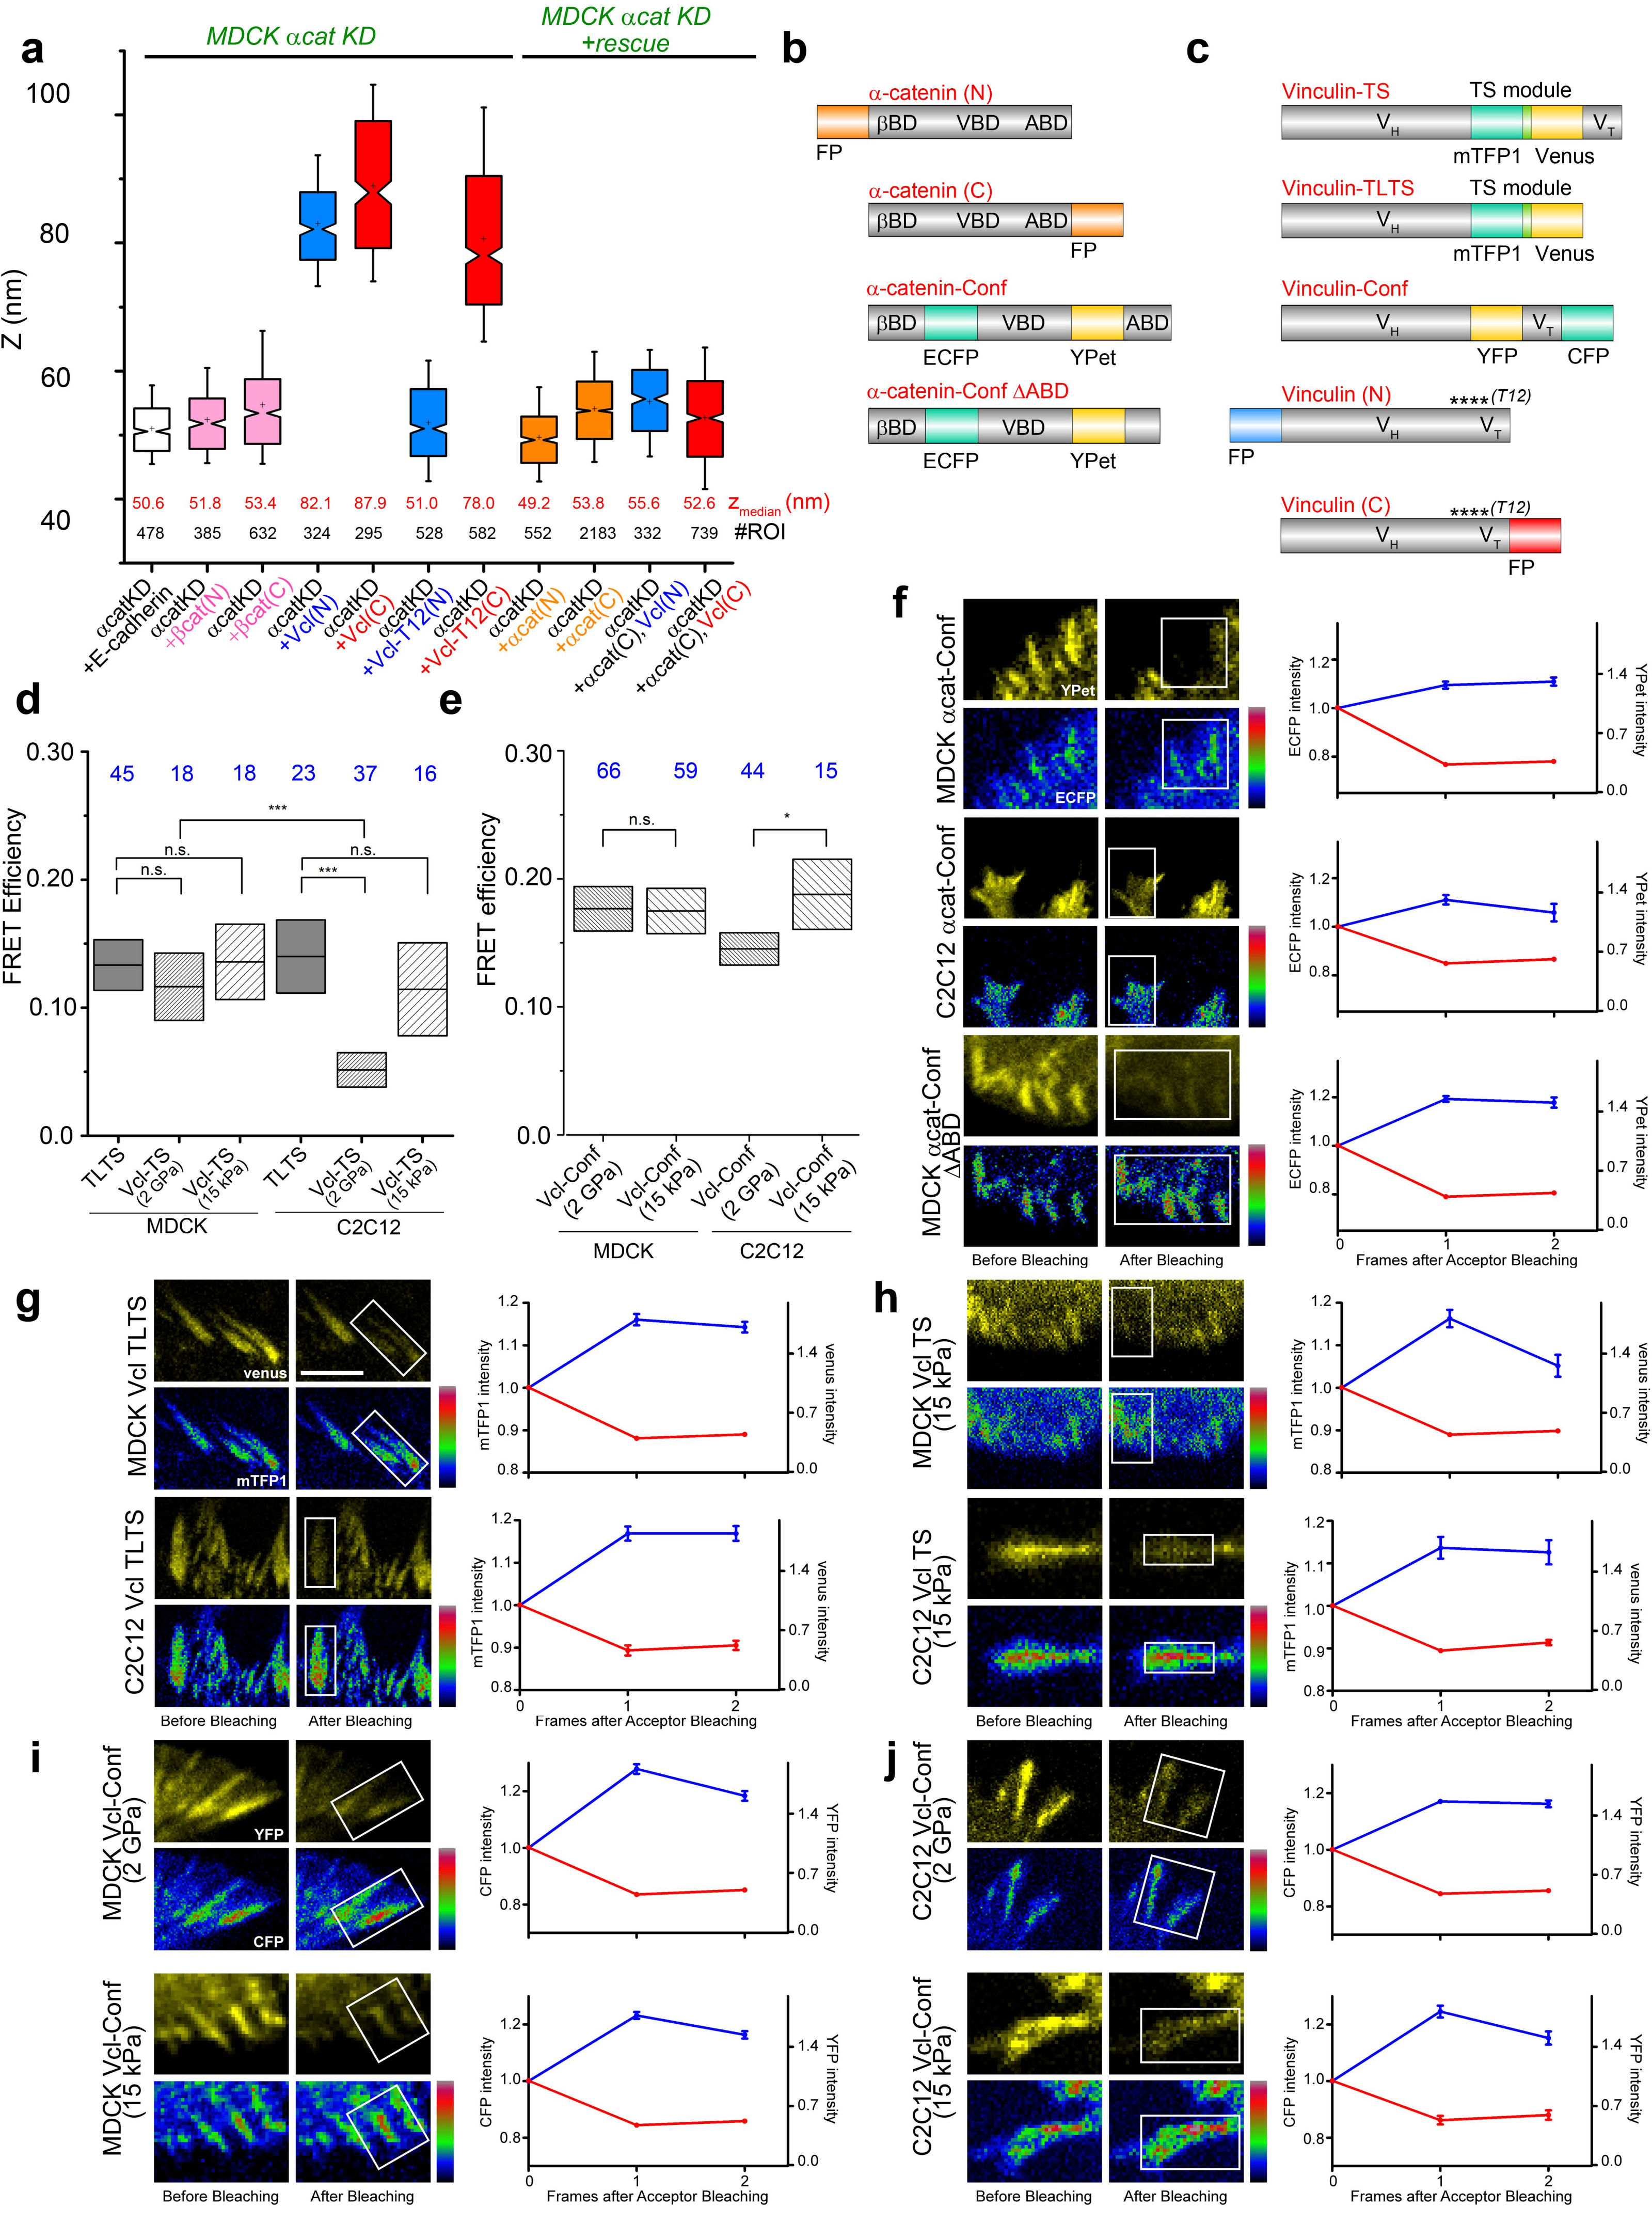

Supplement: NIHMS72649-supplement-Supplementary_figures.pdf [file NIHMS72649-supplement-Supplementary_figures.pdf]
